# Supplementary material for: Injectable Thixotropic β–Cyclodextrin–Functionalized Hydrogels Based on Guanosine Quartet Assembly
Source: MDPI journal article supplement (doi:10.3390/ijms22179179), 2021-08-25
Supplement: s1 [file s1]

# **Injectable thixotropic $\beta$ -cyclodextrin-functionalized hydrogels based on guanosine quartet assembly**

*Monica-Cornelia Sardaru<sup>1</sup>, Irina Rosca<sup>1</sup>, Simona Morariu<sup>2</sup>, Elena-Laura Ursu<sup>1</sup>, Razvan Ghiarasim<sup>1</sup> and Alexandru Rotaru<sup>\*1</sup>*

*<sup>1</sup>“Petru Poni” Institute of Macromolecular Chemistry, Romanian Academy, Centre of Advanced Research in Bionanoconjugates and Biopolymers, Grigore Ghica Voda Alley 41 A, 700487 Iasi, Romania.*

*<sup>2</sup>“Petru Poni” Institute of Macromolecular Chemistry, Romanian Academy, Natural Polymers, Bioactive and Biocompatible Materials, Grigore Ghica Voda Alley 41 A, 700487 Iasi, Romania.*

\* Correspondence: [rotaru.alexandru@icmpp.ro](mailto:rotaru.alexandru@icmpp.ro)

## **Content**

- |                           |                               |
|---------------------------|-------------------------------|
| 1. CD spectra             | – <b>Figure S1-S7</b>         |
| 2. SEM images             | – <b>Figures S8-S14</b>       |
| 3. AFM images             | – <b>Figures S15 –S19</b>     |
| 4. Antimicrobial activity | – <b>Figure S20, Table S1</b> |

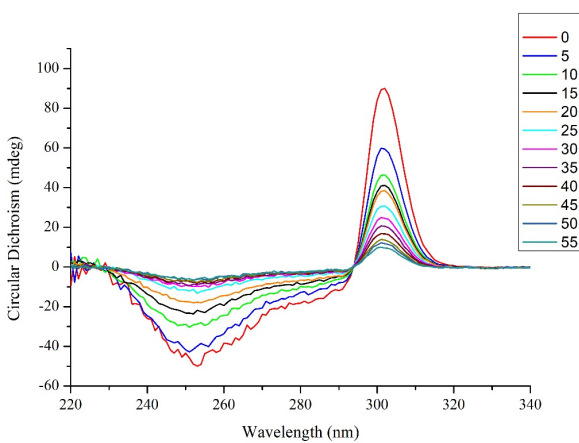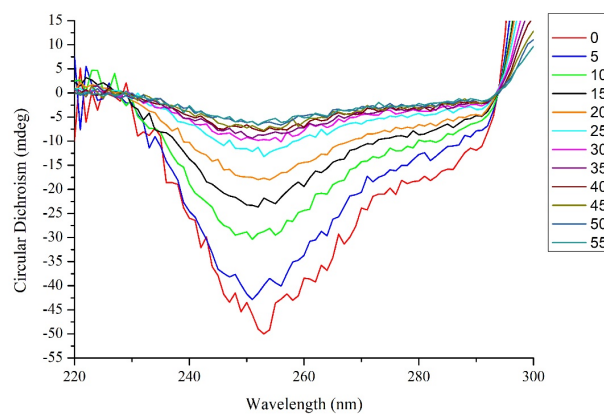

**Figure S1.** CD spectra of G4-CD\_1 in the 220-340 nm range (left) and 220-300 nm range (right) recorded every five minutes from 60 °C to 25 °C.

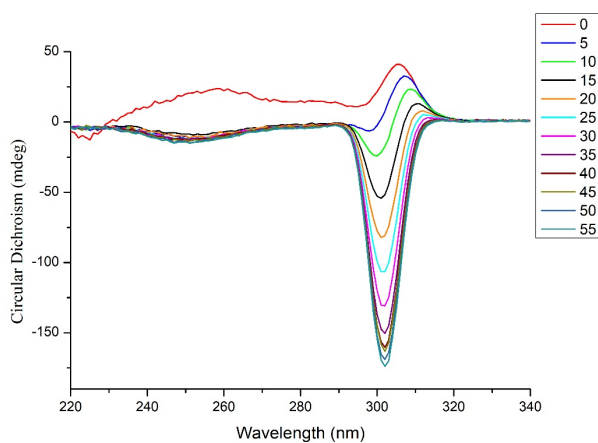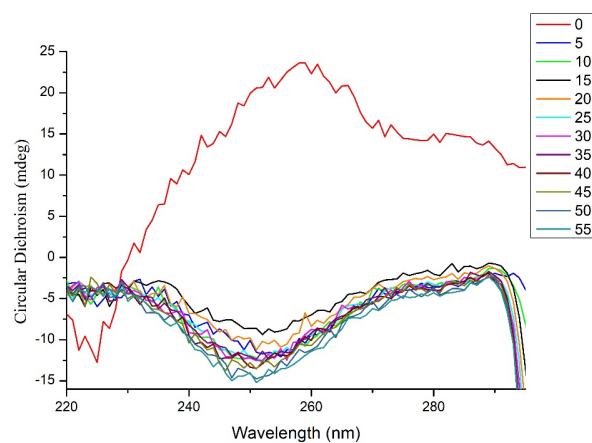

**Figure S2.** CD spectra of G4-CD\_2 in the 220-340 nm range (left) and 220-300 nm range (right) recorded every five minutes from 60 °C to 25 °C.

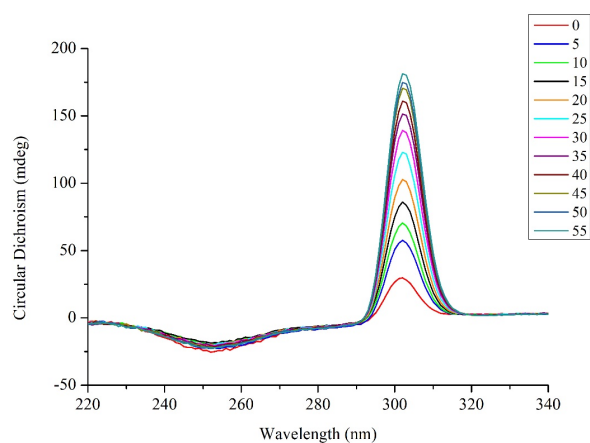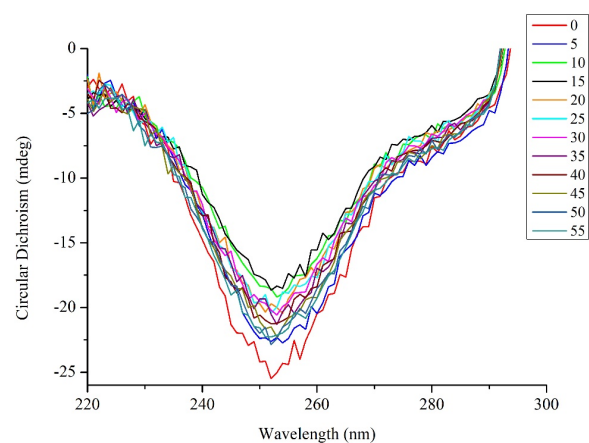

**Figure S3.** CD spectra of G4-CD\_3 in the 220-340 nm range (left) and 220-300 nm range (right) recorded every five minutes from 60 °C to 25 °C.

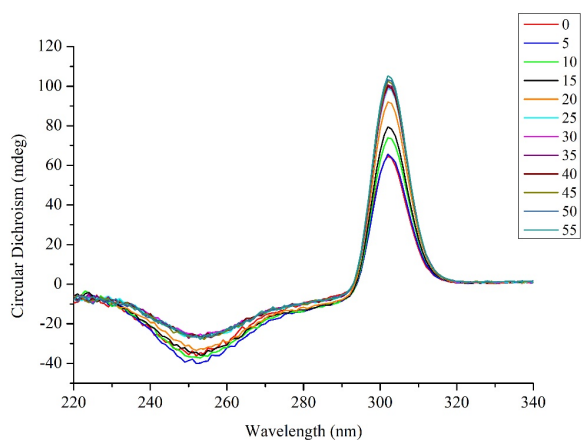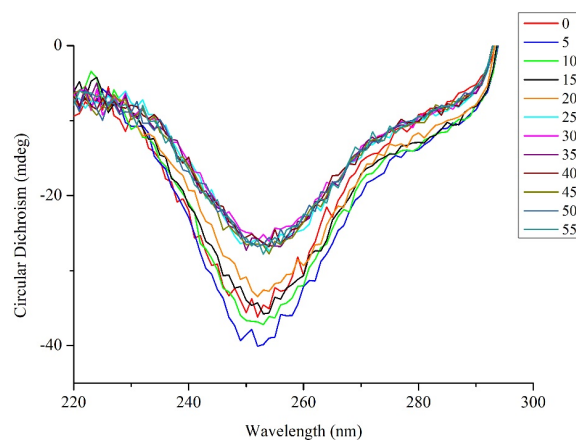

**Figure S4.** CD spectra of G4-CD\_4 in the 220-340 nm range (left) and 220-300 nm range (right) recorded every five minutes from 60 °C to 25 °C.

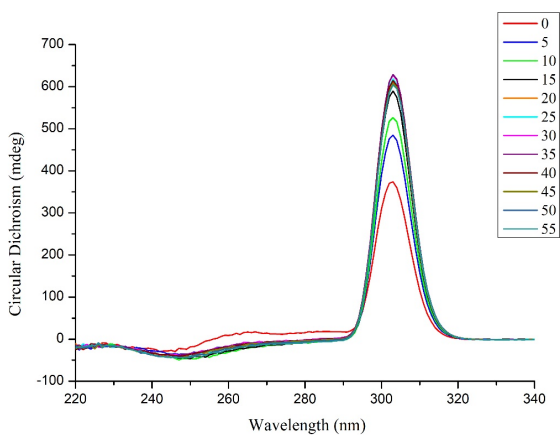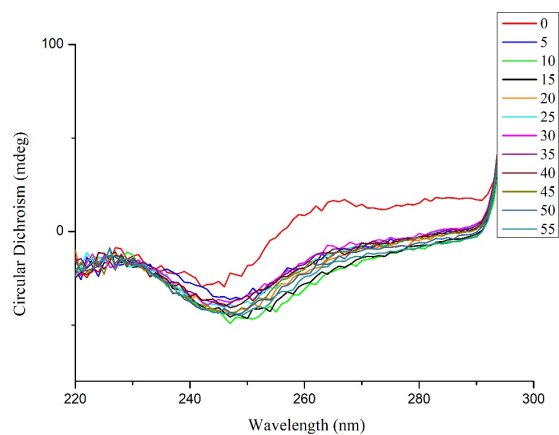

**Figure S5.** CD spectra of G4-CD\_5 in the 220-340 nm range (left) and 220-300 nm range (right) recorded every five minutes from 60 °C to 25 °C.

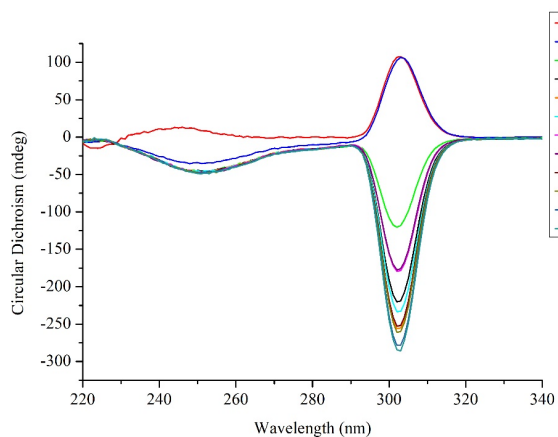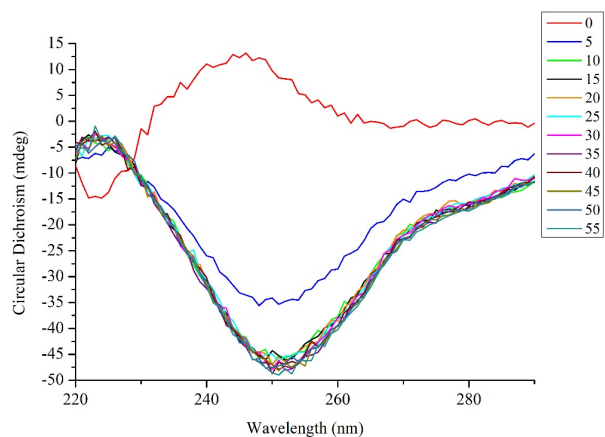

**Figure S6.** CD spectra of G4-CD\_6 in the 220-340 nm range (left) and 220-300 nm range (right) recorded every five minutes from 60 °C to 25 °C.

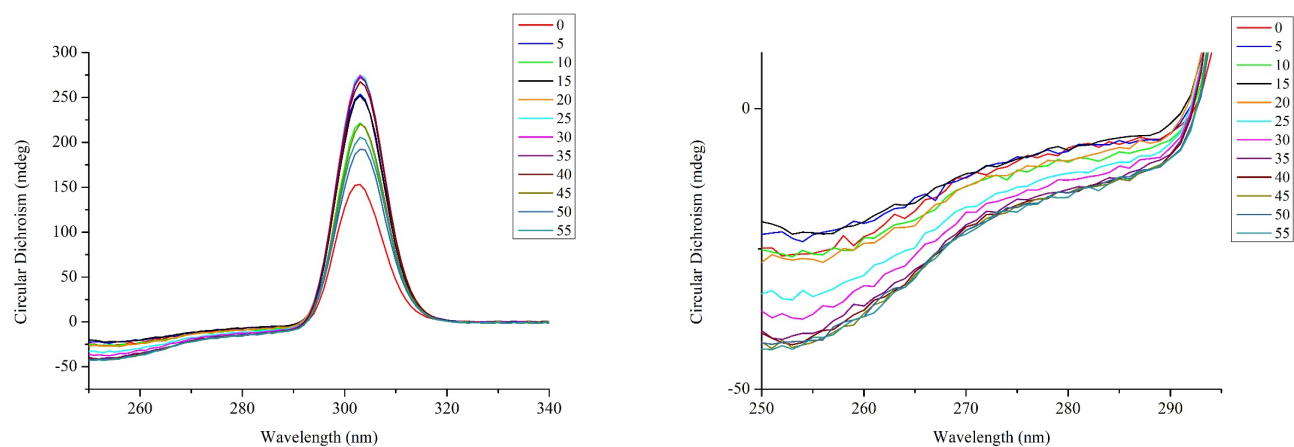

**Figure S7.** CD spectra of G4-CD\_7 in the 220-340 nm range (left) and 220-300 nm range (right) recorded every five minutes from 60 °C to 25 °C.

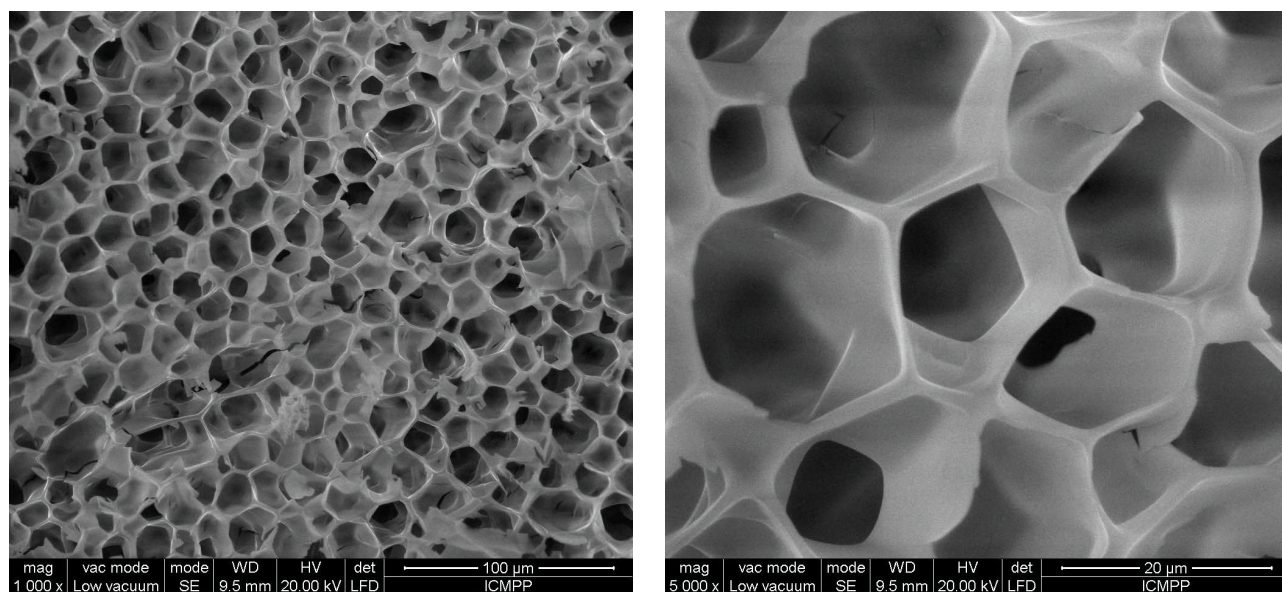

**Figure S8.** SEM images of G4-CD\_1 at different magnifications. Scale bar – 100 µm (left) and 20 µm (right).



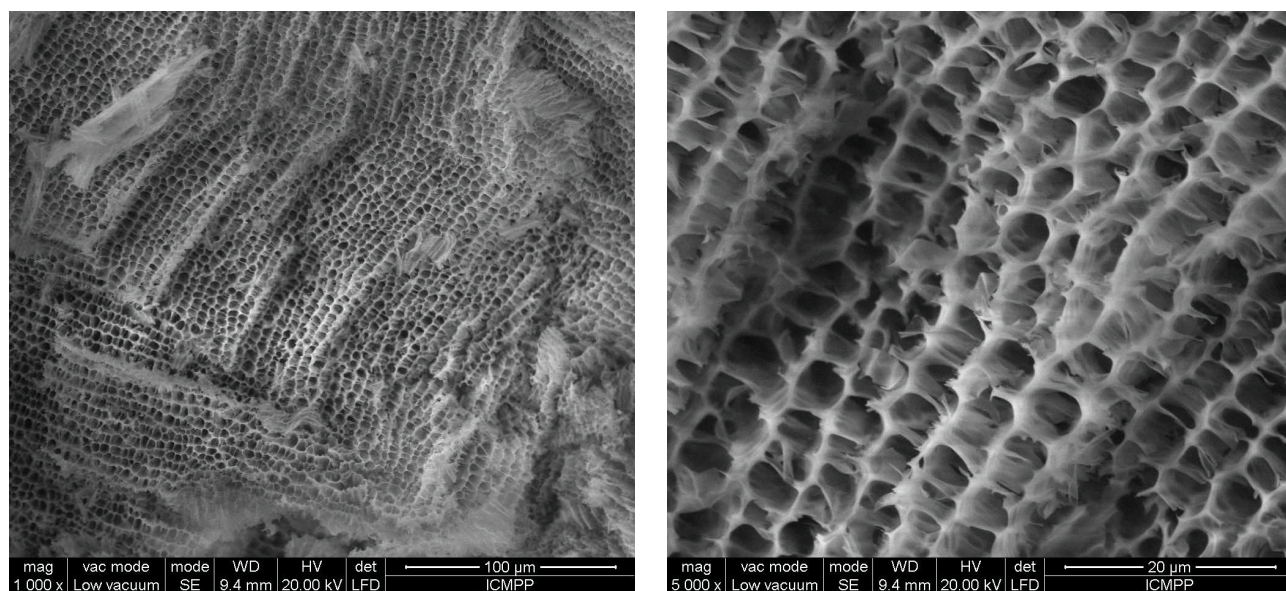

**Figure S9.** SEM images of G4-CD<sub>2</sub> at different magnifications. Scale bar – 100 μm (left) and 20 μm (right).

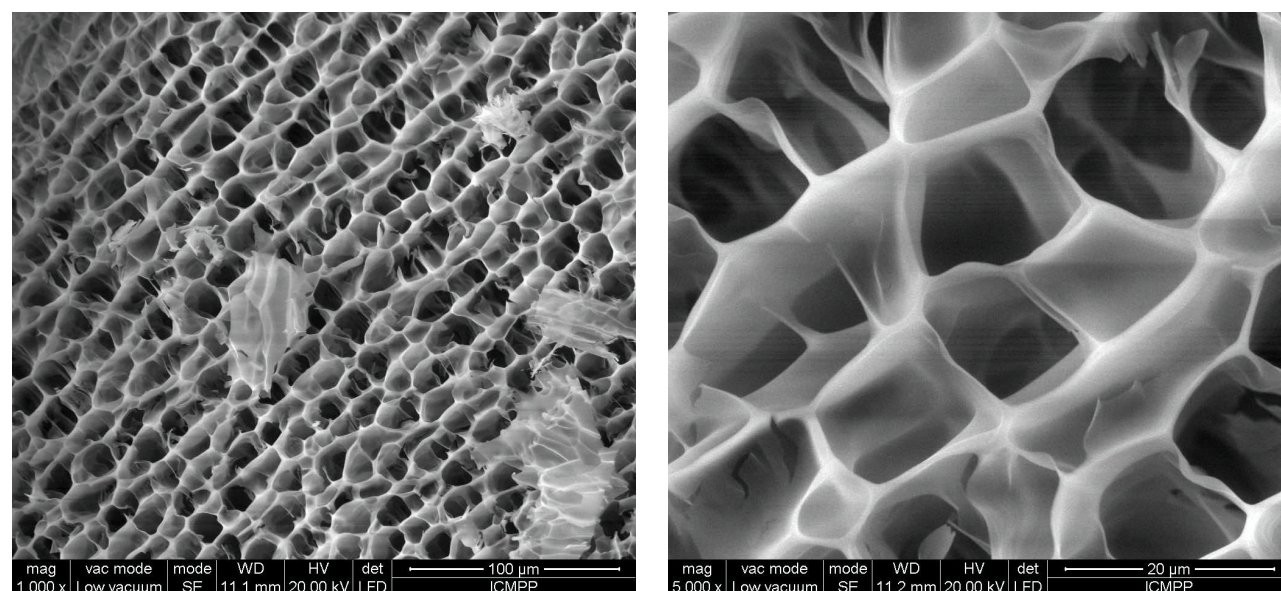

**Figure S10.** SEM images of G4-CD<sub>3</sub> at different magnifications. Scale bar – 100 μm (left) and 20 μm (right).

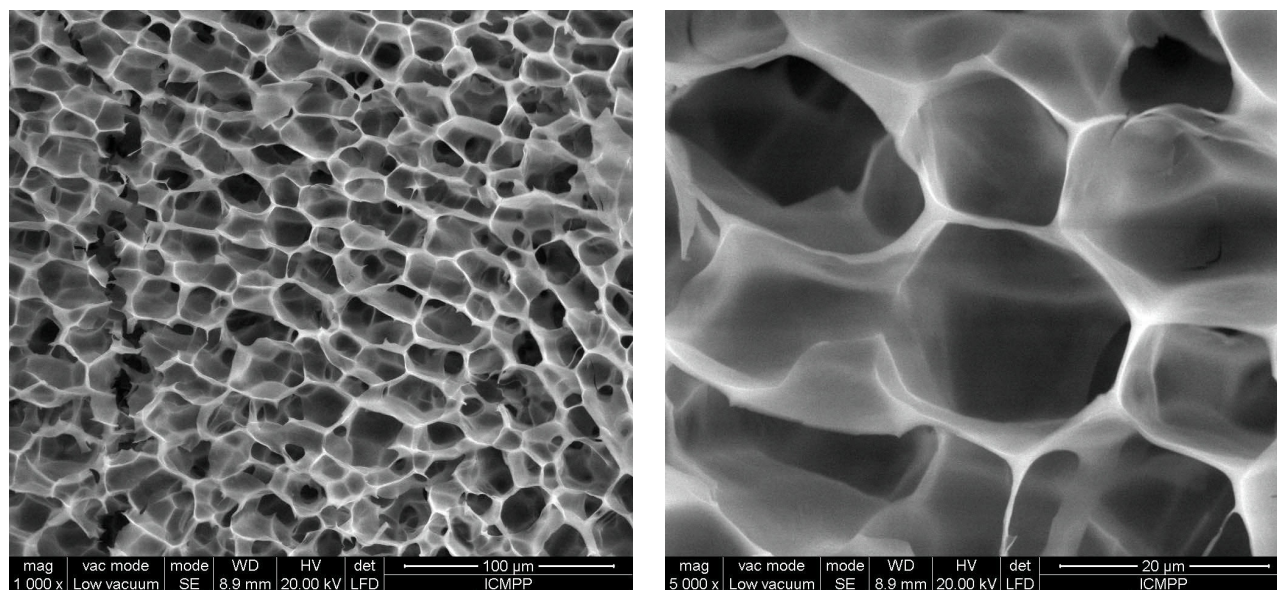

**Figure S11.** SEM images of G4-CD\_4 at different magnifications. Scale bar – 100 μm (left) and 20 μm (right).

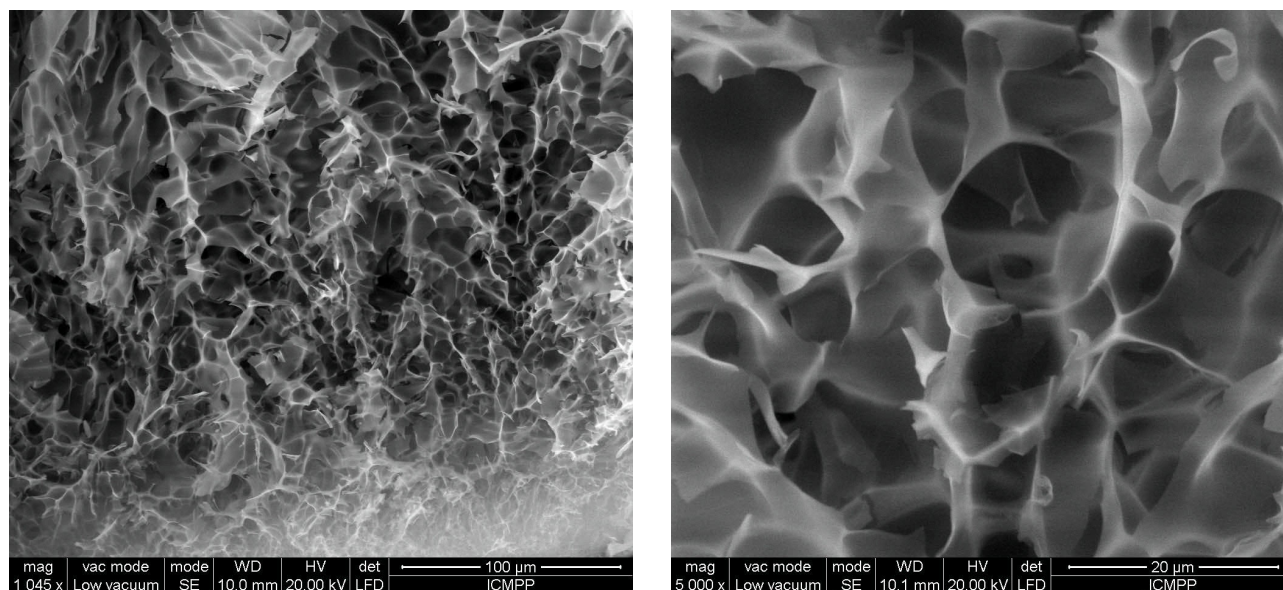

**Figure S12.** SEM images of G4-CD\_5 at different magnifications. Scale bar – 100 μm (left) and 20 μm (right).



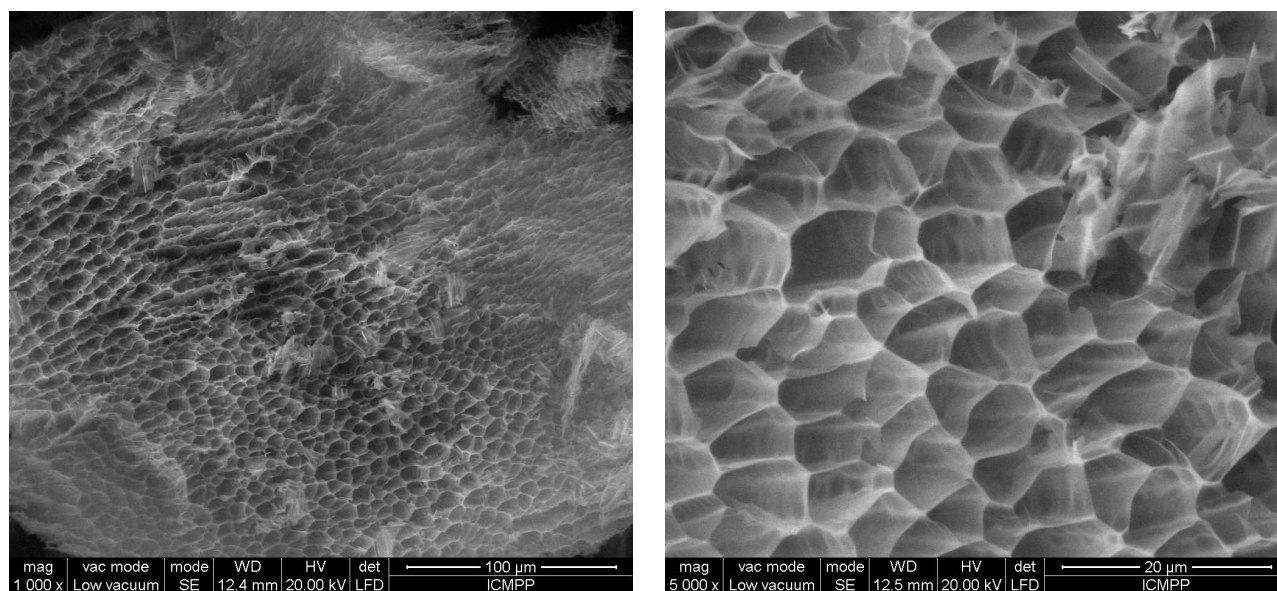

**Figure S13.** SEM images of G4-CD<sub>6</sub> at different magnifications. Scale bar – 100 μm (left) and 20 μm (right).

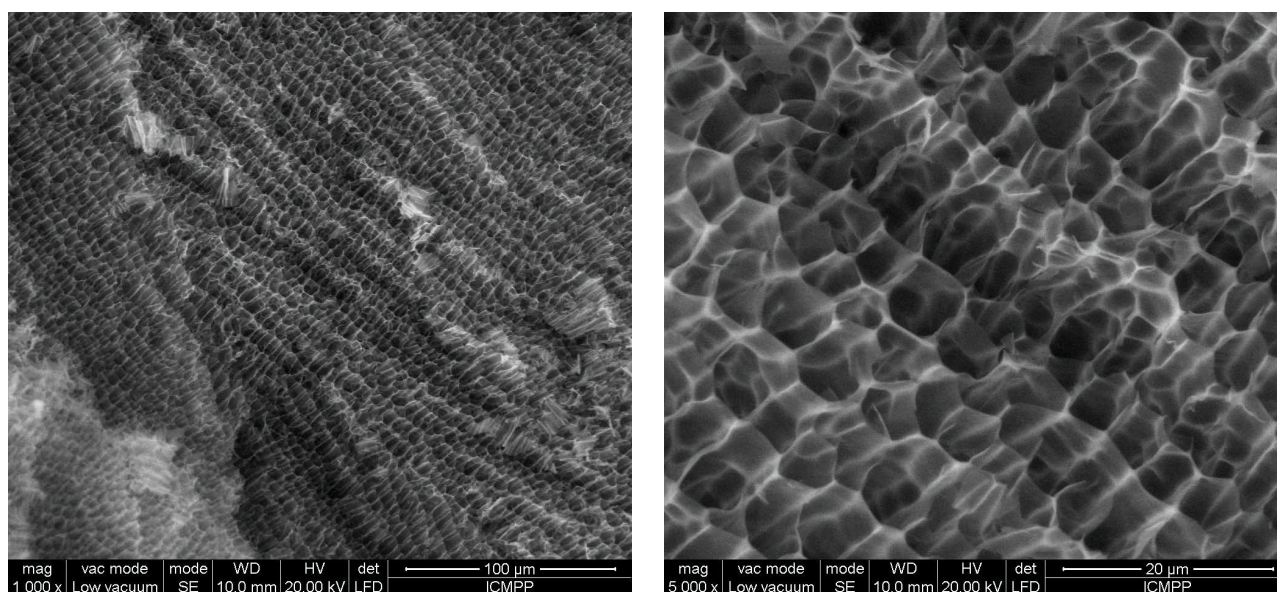

**Figure S14.** SEM images of G4-CD<sub>7</sub> at different magnifications. Scale bar – 100 μm (left) and 20 μm (right).

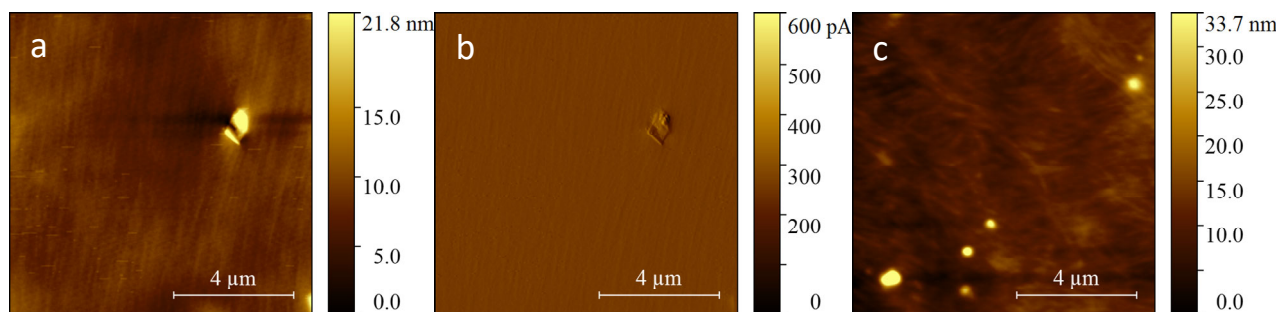

**Figure S15.** AFM (a) and error signal images (b) of G4-CD\_1; (c) AFM images of G4-CD\_2: scale bar – 4  $\mu\text{m}$ .

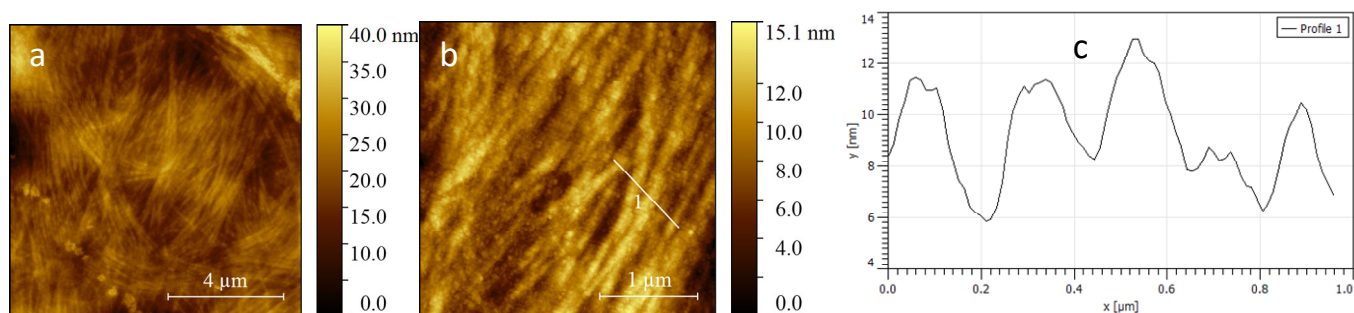

**Figure S16.** AFM images of G4-CD\_4: (a) scale bar – 4  $\mu\text{m}$ ; (b) scale bar – 1  $\mu\text{m}$ ; (c) Z-profiles along the lines marked on the images.

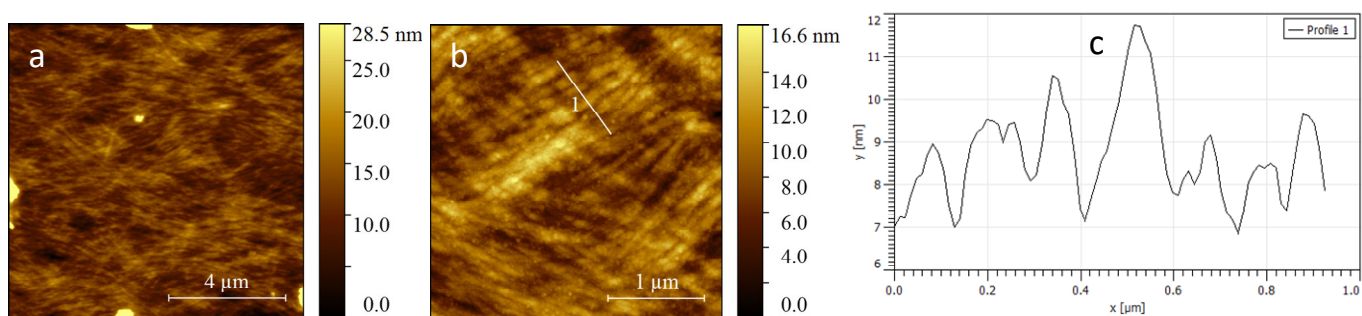

**Figure S17.** AFM images of G4-CD\_5: (a) scale bar – 4  $\mu\text{m}$ ; (b) scale bar – 1  $\mu\text{m}$ ; (c) Z-profiles along the lines marked on the images.

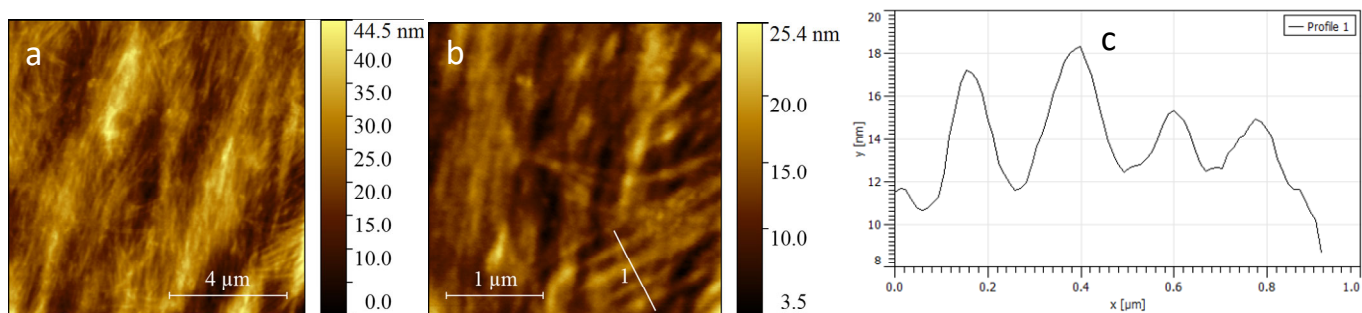

**Figure S18.** AFM images of G4-CD<sub>6</sub>: (a) scale bar – 4 μm; (b) scale bar – 1 μm; (c) Z-profiles along the lines marked on the images.

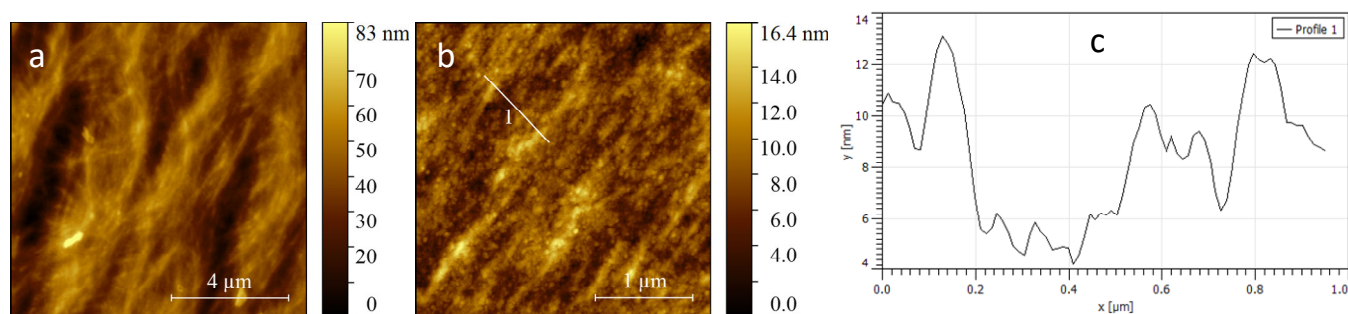

**Figure S19.** AFM images of G4-CD<sub>7</sub>: (a) scale bar – 4 μm; (b) scale bar – 1 μm; (c) Z-profiles along the lines marked on the images.



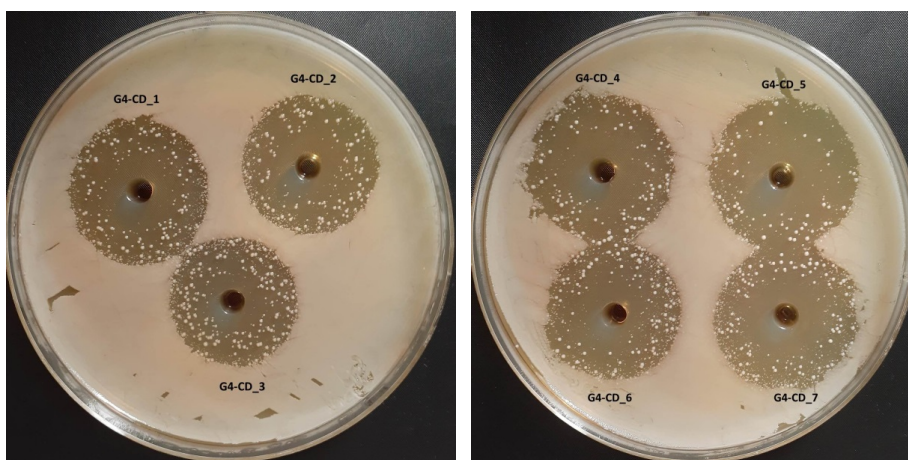

**Figure S20.** Antibacterial activity of the G4-CD\_1-7 hydrogels against *S. aureus*.

**Table S1.** Antimicrobial activity of the G4-CD\_1-7 hydrogels against the references strains.

| Strains                | Inhibition zone (mm) |            |            |            |            |            |            |
|------------------------|----------------------|------------|------------|------------|------------|------------|------------|
|                        | G4-CD_1              | G4-CD_2    | G4-CD_3    | G4-CD_4    | G4-CD_5    | G4-CD_6    | G4-CD_7    |
| <i>S. aureus</i>       | 30.30±1.50           | 30.80±0.80 | 29.21±0.37 | 32.99±0.03 | 33.21±0.71 | 31.95±0.19 | 32.13±0.92 |
| <i>E. coli</i>         | -                    | -          | -          | -          | -          | -          | -          |
| <i>E. faecalis</i>     | -                    | -          | -          | -          | -          | -          | -          |
| <i>K. pneumoniae</i>   | -                    | -          | -          | -          | -          | -          | -          |
| <i>S. typhimurium</i>  | -                    | -          | -          | -          | -          | -          | -          |
| <i>C. albicans</i>     | -                    | -          | -          | -          | -          | -          | -          |
| <i>C. glabrata</i>     | -                    | -          | -          | -          | -          | -          | -          |
| <i>A. brasiliensis</i> | -                    | -          | -          | -          | -          | -          | -          |
